# Supplementary material for: Chemically Modified Bovine β-Lactoglobulin as a Broad-Spectrum Influenza Virus Entry Inhibitor with the Potential to Combat Influenza Outbreaks
Source: Viruses. 2022 Sep 16;14(9):2055. doi: 10.3390/v14092055 (PMC9506557; doi:10.3390/v14092055)
Supplement: Supplementary file 1 [file viruses-14-02055-s001.zip › viruses-1867692-supplementary.pdf]

# Chemically Modified Bovine $\beta$ -Lactoglobulin as a Broad-Spectrum Influenza Virus Entry Inhibitor with the Potential to Combat Influenza Outbreaks

Yuhong Fu <sup>1</sup>, Peiyu Li <sup>1,2</sup>, Wei Xu <sup>1</sup>, Zezhong Liu <sup>1</sup>, Cong Wang <sup>1</sup>, Qian Wang <sup>1</sup>, Jiayi Tang <sup>1</sup>, Weihua Li <sup>3</sup>, Lu Lu <sup>1,\*</sup> and Shibo Jiang <sup>1,2,3,\*</sup>

<sup>1</sup> Key Laboratory of Medical Molecular Virology of MOE/MOH, School of Basic Medical Sciences, Shanghai Public Health Clinical Center, Fudan University, 131 Dong An Rd., Xuhui District, Shanghai 200032, China

<sup>2</sup> Department of Infectious Diseases and Shenzhen Key Laboratory for Endogenous Infection, Shenzhen Nanshan People's Hospital and the Affiliated Shenzhen Sixth Hospital of Guangdong Medical University, Shenzhen 518052, China

<sup>3</sup> NHC Key Lab of Reproduction Regulation (Shanghai Institute for Biomedical and Pharmaceutical Technologies), Fudan University, 2140 Xie Tu Rd., Xuhui District, Shanghai 200032, China

\* Correspondence: lul@fudan.edu.cn (L.L.); shibojiang@fudan.edu.cn (S.J.); Tel.: +86-21-5423-7671 (L.L.); +86-21-5423-7673 (S.J.)

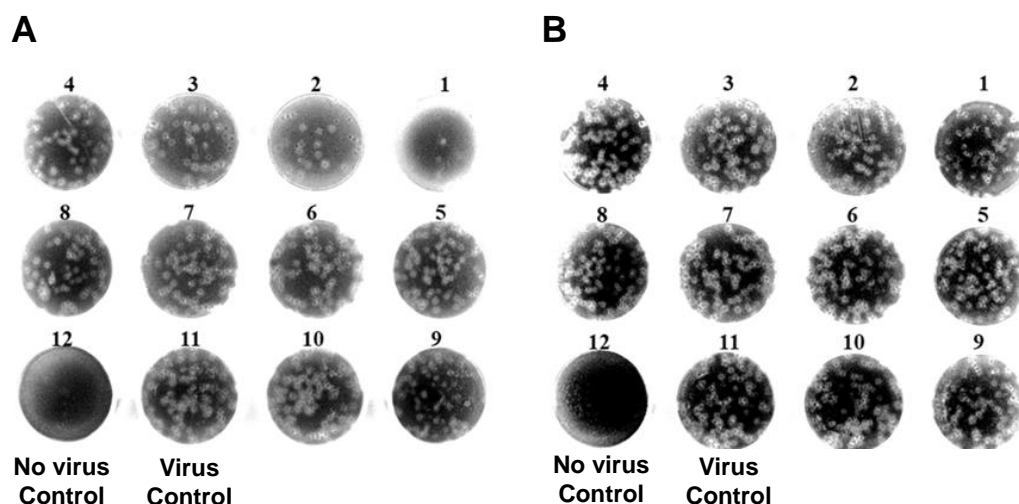

| Group                | Concentration (nM) |      |     |    |   |     |      |       |        |         |    |    |
|----------------------|--------------------|------|-----|----|---|-----|------|-------|--------|---------|----|----|
| No.                  | 1                  | 2    | 3   | 4  | 5 | 6   | 7    | 8     | 9      | 10      | 11 | 12 |
| A (3HP- $\beta$ -LG) | 20000              | 2000 | 200 | 20 | 2 | 0.2 | 0.02 | 0.002 | 0.0002 | 0.00002 | 0  | 0  |
| B ( $\beta$ -LG)     | 20000              | 2000 | 200 | 20 | 2 | 0.2 | 0.02 | 0.002 | 0.0002 | 0.00002 | 0  | 0  |
| Virus                | +                  | +    | +   | +  | + | +   | +    | +     | +      | +       | +  | -  |

Figure S1: Inhibition of 3HP- $\beta$ -LG against influenza A(H1N1)/PR8 as detected by plaque reduction assay

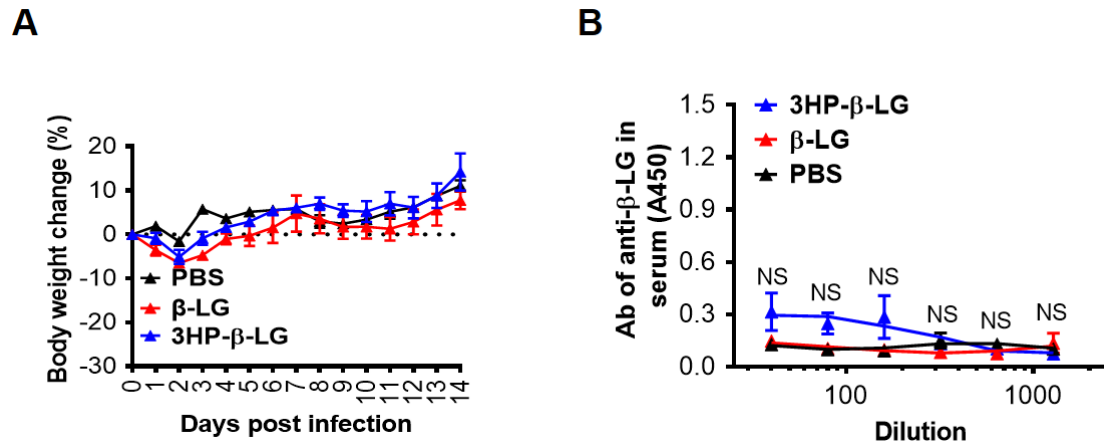

**Figure S2:** (A) Bodyweight change (%) of mice intranasally administered with 3HP-β-LG or β-LG at 80 mg/kg, or PBS (as control), on day 0, 1, 3, and 5, respectively. Bodyweight of mice was recorded d.p.i. (B) The titer of β-LG-specific antibodies in sera of mice intranasally administered with 3HP-β-LG or β-LG at 80 mg/kg, or PBS (as control), on day 0, 1, 3, and 5, respectively. Sera were collected and tested on day 14.

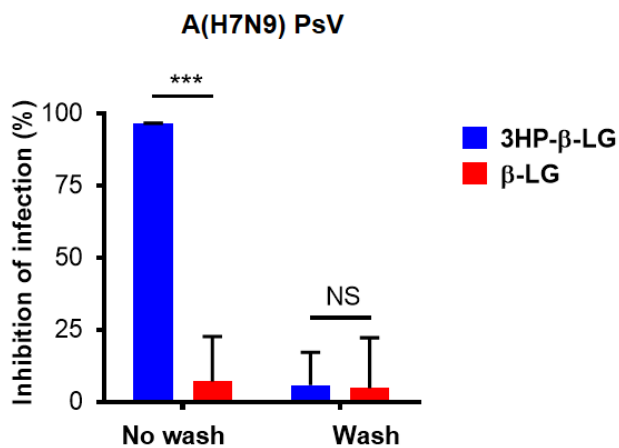

**Figure S3:** Washout assay. “Wash” or “No wash” indicate that MDCK cells treated with 3HP-β-LG or β-LG were washed or not washed before addition of influenza A (H7N9) PsV; and SDS-PAGE analysis of β-LG modified with different concentration of 3HP.
